# Supplementary material
Source: MDPI journal article supplement (https://www.mdpi.com/1999-4907/13/1/70)
Supplement: s1 [file s1]

## SUPPLEMENTARY INFORMATION

### Quantifying the life cycle greenhouse gas emissions of a mechanized shelterwood harvest producing both sawtimber and woodchips

Joshua P. Weyrens, René H. Germain, Obste Therasme\*

Department of Sustainable Resources Management, SUNY College of Environmental Science and Forestry, Syracuse, NY, United states

\*Corresponding author: otherasm@esf.edu

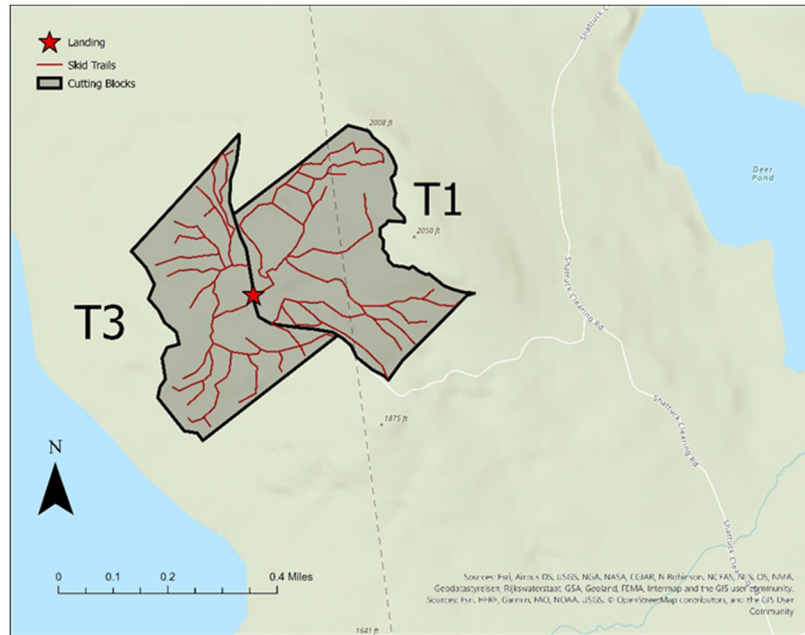

**Figure S1.** Harvesting blocks T1 and T3 with digitized skid trails and landing.

## SUPPLEMENTARY INFORMATION

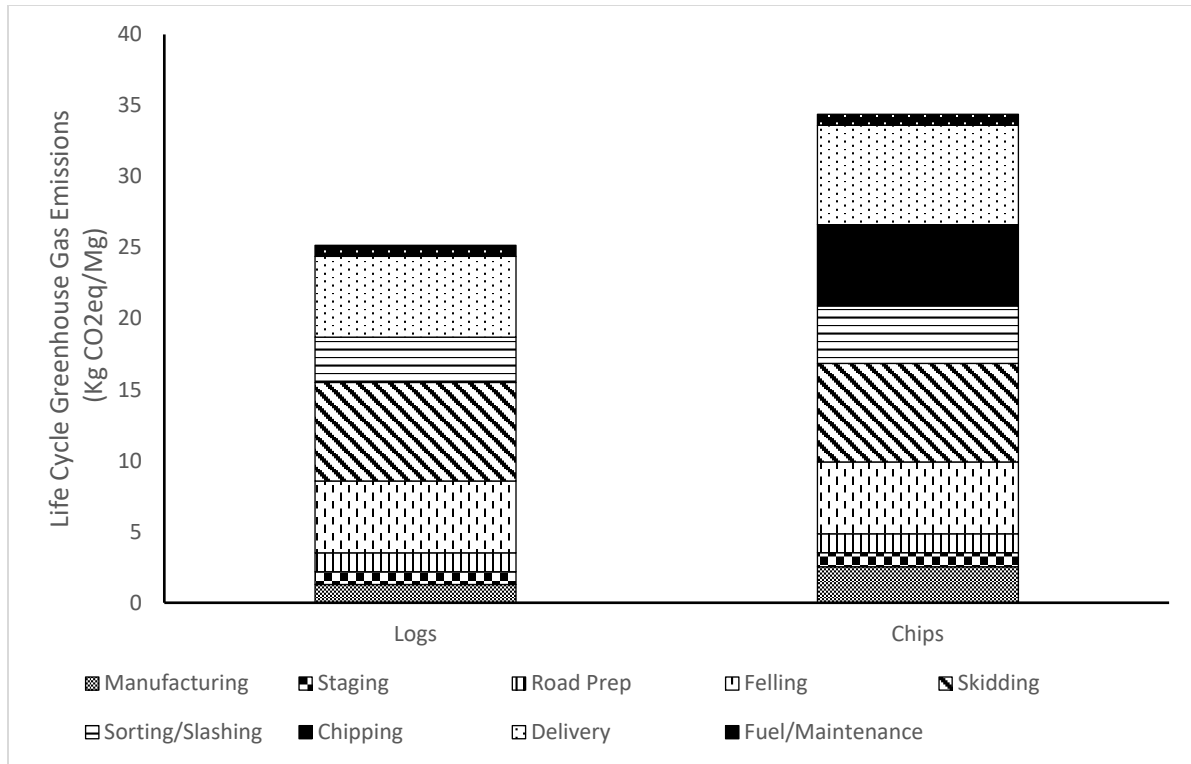

**Figure S2.** Life cycle greenhouse gas emissions of sawlogs and clean chips under the hypothetical scenario that both the paper mill and the sawmill are located 71 kilometers away from the landing.

## SUPPLEMENTARY INFORMATION

**Table S1.** Details of fuel, lubricant, and coolant consumption for all the machines

### S3A-Fuel.

| Machine         | Average Fuel Rate (L/hour) | Hours  | Fuel Consumption (L) |
|-----------------|----------------------------|--------|----------------------|
| Feller-Buncher  | 33.69                      | 139    | 4683                 |
| Feller-Buncher  | 32.93                      | 153.17 | 5044                 |
| Skidder         | 27.44                      | 184.65 | 5068                 |
| Skidder         | 22.33                      | 152.42 | 3404                 |
| Skidder         | 19.87                      | 170.88 | 3396                 |
| Skidder         | 24.61                      | 81.75  | 2011                 |
| Loader          | 23.66                      | 141.58 | 3350                 |
| Loader          | 23.66                      | 172.48 | 4081                 |
| Bulldozer       | 20.28                      | 28     | 568                  |
| Grader          | 17.10                      | 27     | 462                  |
| Excavator       | 30.66                      | 50     | 1533                 |
| Utility Truck   | 13.52                      | 112    | 1514                 |
|                 | Fuel Rate (L/load)         | Loads  |                      |
| Flail Chipper   | 66.24                      | 150    | 9936                 |
|                 | Fuel Rate (L/km)           | km     |                      |
| Tractor-Trailer | 1.74                       | 39645  | 68982                |

### S3B- Lubricant

| Machine         | Oil Capacity (L) | Oil Consumption (L/hr) | Oil Consumption (kg/hr) | Hours | Oil Subtotal (kg) | Hydraulic Fluid (L) | Fluid Mass (kg) | Total Lubricant (kg) |
|-----------------|------------------|------------------------|-------------------------|-------|-------------------|---------------------|-----------------|----------------------|
| Feller-buncher  | 26.5             | 0.106                  | 0.092                   | 153   | 14.2              | 75.7                | 66.6            | 80.8                 |
| Feller-buncher  | 22.7             | 0.091                  | 0.079                   | 139   | 11.0              | 75.7                | 66.6            | 77.6                 |
| Skidder         | 15.1             | 0.061                  | 0.053                   | 185   | 9.8               | 18.9                | 16.7            | 26.4                 |
| Skidder         | 18.9             | 0.076                  | 0.066                   | 152   | 10.1              | 18.9                | 16.7            | 26.7                 |
| Skidder         | 15.1             | 0.061                  | 0.053                   | 171   | 9.0               | 18.9                | 16.7            | 25.7                 |
| Skidder         | 18.9             | 0.076                  | 0.066                   | 82    | 5.4               | 18.9                | 16.7            | 22.1                 |
| Loader          | 18.9             | 0.076                  | 0.066                   | 142   | 9.4               | 75.7                | 66.6            | 76.0                 |
| Loader          | 18.9             | 0.076                  | 0.066                   | 172   | 11.4              | 75.7                | 66.6            | 78.0                 |
| Bulldozer       | 24.6             | 0.098                  | 0.086                   | 28    | 2.4               | 56.8                | 49.7            | 3.0                  |
| Grader          | 24.6             | 0.098                  | 0.086                   | 27    | 2.3               | 143.8               | 124.4           | 3.7                  |
| Excavator       | 26.5             | 0.106                  | 0.092                   | 50    | 4.6               | 246.1               | 215.4           | 8.9                  |
| Utility Truck   | 6.6              | 0.026                  | 0.023                   | 112   | 2.6               |                     |                 | 2.6                  |
| Flail Chipper   | 68.1             | 0.273                  | 0.238                   | 150   | 35.7              | 193.1               | 169.9           | 205.6                |
|                 |                  | Consumption (L/km)     | Consumption (kg/km)     | Km    |                   |                     |                 |                      |
| Tractor-Trailer | 37.9             | 0.0029                 | 0.0026                  | 39645 | 101.7             |                     |                 | 101.7                |

## SUPPLEMENTARY INFORMATION

### S3C- Coolant

| Machine         | Coolant Type  | System Volume (L) | Antifreeze Volume (L) | Antifreeze (kg) | Ethylene Glycol (kg) | Diethylene Glycol (kg) | Mass for 5 Years (kg) | Mass for 1 Month (kg) | Total Mass |
|-----------------|---------------|-------------------|-----------------------|-----------------|----------------------|------------------------|-----------------------|-----------------------|------------|
| Feller-Buncher  | extended life | 37.85             | 18.93                 | 21.50           | 18.92                | 0.86                   | 19.78                 | 0.21                  | 0.41       |
| Skidder         | extended life | 37.85             | 18.93                 | 21.50           | 18.92                | 0.86                   | 19.78                 | 0.21                  | 0.82       |
| Loader          | extended life | 37.85             | 18.93                 | 21.50           | 18.92                | 0.86                   | 19.78                 | 0.21                  | 0.41       |
| Bulldozer       | green         | 37.85             | 18.93                 | 21.34           | 20.48                | 0.00                   | 20.48                 | 0.21                  | 0.21       |
| Grader          | green         | 45.42             | 22.71                 | 25.60           | 24.58                | 0.00                   | 24.58                 | 0.26                  | 0.26       |
| Excavator       | extended life | 34.83             | 17.41                 | 19.78           | 17.41                | 0.79                   | 18.20                 | 0.19                  | 0.19       |
| Utility Truck   | extended life | 4.73              | 2.37                  | 2.69            | 2.37                 | 0.11                   | 2.47                  | 0.03                  | 0.03       |
| Flail Chipper   | extended life | 49.21             | 24.61                 | 27.95           | 24.60                | 1.12                   | 25.72                 | 0.27                  | 0.27       |
| Tractor-Trailer | extended life | 45.42             | 22.71                 | 25.80           | 22.71                | 1.03                   | 23.74                 | 0.36                  | 1.98       |

### S3D- Grease

| Machine         | Tubes of Grease/Day | Days | USD of Grease |
|-----------------|---------------------|------|---------------|
| Feller-Buncher  | 1                   | 30   | 67.50         |
| Skidder         | 1                   | 68   | 153.00        |
| Loader          | 1                   | 34   | 76.50         |
| Bulldozer       | 1                   | 4    | 9.00          |
| Grader          | 1                   | 3    | 6.75          |
| Excavator       | 1                   | 6    | 13.50         |
| Utility Truck   | 0.14                | 14   | 4.50          |
| Flail Chipper   | 1.2                 | 19   | 51.30         |
| Tractor-Trailer | 0.14                | 168  | 54.05         |

### S3E-Material Densities

| Fluid                 | Density (kg/L at STP) |
|-----------------------|-----------------------|
| 15w40 motor oil       | 0.8725                |
| AW46 hydraulic fluid  | 0.88                  |
| 30W motor oil         | 0.8754                |
| 10w30 (tractor fluid) | 0.865                 |
| Ethylene glycol       | 1.11                  |
| Diethylene glycol     | 1.12                  |

## SUPPLEMENTARY INFORMATION

**Table S2.** Summaries of material produced and all fuel, lubricant, coolant, grease and equipment used during a mechanized shelterwood harvest producing both sawtimber and woodchips.

| Input Parameter names                   | Baseline value | Unit |
|-----------------------------------------|----------------|------|
| Chips production                        | 4894           | Mg   |
| Log production                          | 527            | Mg   |
| Chipper staging coolant                 | 0.02           | kg   |
| Chipper staging diesel fuel             | 79.2           | L    |
| Chipper staging grease                  | 0.38           | USD  |
| Chipper staging oil                     | 0.71           | kg   |
| Chip delivery coolant                   | 2.0            | kg   |
| Chip delivery diesel fuel               | 10836          | L    |
| Chip delivery grease                    | 45             | USD  |
| Chip delivery oil                       | 97             | kg   |
| Chipper coolant                         | 0.27           | kg   |
| Bulldozer coolant                       | 0.2            | kg   |
| Excavator coolant                       | 0.19           | kg   |
| Feller-buncher coolant                  | 0.41           | kg   |
| Fuel/maintenance coolant                | 0.03           | kg   |
| Grader coolant                          | 0.3            | kg   |
| Skidder coolant                         | 0.824          | kg   |
| Slashing/loading logs coolant           | 0.033          | kg   |
| Sort/slash and chipping coolant         | 0.38           | kg   |
| Diesel fuel – chipper *                 | 4968           | L    |
| Diesel fuel – bulldozer *               | 284            | L    |
| Diesel fuel – excavator *               | 766.5          | L    |
| Diesel fuel - feller buncher *          | 4864           | L    |
| Diesel fuel – fuel/maintenance *        | 757.1          | L    |
| Diesel fuel – grader *                  | 231            | L    |
| Diesel fuel – skidder *                 | 6694           | L    |
| Diesel fuel – sorting/loading logs *    | 297.3          | L    |
| Diesel fuel – sort/slash and chipping * | 3502           | L    |
| Chipper grease                          | 51             | USD  |
| Bulldozer grease                        | 9              | USD  |
| Excavator grease                        | 13.5           | USD  |
| Feller-buncher grease                   | 68             | USD  |
| Fuel/maintenance grease                 | 4.5            | USD  |
| Grader grease                           | 6.75           | USD  |
| Skidder grease                          | 153            | USD  |
| Slashing/loading logs grease            | 6.3            | USD  |
| Sort/slash and chipping grease          | 72.45          | USD  |
| Chipper hours                           | 171            | hrs  |
| Bulldozer hours                         | 28             | hrs  |
| Excavator hours                         | 50             | hrs  |
| Feller-buncher hours                    | 292            | hrs  |
| Fuel/maintenance hours                  | 112            | hrs  |
| Grader hours                            | 27             | hrs  |
| Skidder hours                           | 565            | hrs  |
| Slashing/loading logs hours             | 26             | hrs  |

## SUPPLEMENTARY INFORMATION

|                                     |          |      |
|-------------------------------------|----------|------|
| Sort/slash chipping hours           | 296.1    | hrs  |
| Lifetime hours chipper              | 15000    | hrs  |
| Lifetime hours bulldozer            | 5000     | hrs  |
| Lifetime hours excavator            | 5000     | hrs  |
| Lifetime hours feller-buncher       | 15000    | hrs  |
| Lifetime hours grader               | 5000     | hrs  |
| Lifetime hours loader               | 15000    | hrs  |
| Lifetime hours skidder              | 15000    | hrs  |
| Lifetime hours maintenance truck    | 321869   | hrs  |
| Lifetime trailer                    | 15800000 | Mgkm |
| Lifetime truck                      | 15800000 | Mgkm |
| Coolant – log delivery              | 0.18     | kg   |
| Diesel – log delivery               | 536      | L    |
| Grease – log delivery               | 4.5      | USD  |
| Engine oil – log delivery           | 4.8      | kg   |
| Lubricant – chipper                 | 190      | kg   |
| Lubricant – bulldozer               | 3.0      | kg   |
| Lubricant - excavator               | 8.9      | kg   |
| Lubricant - feller buncher          | 158      | kg   |
| Lubricant – fuel/maintenance        | 2.6      | kg   |
| Lubricant – grader                  | 3.7      | kg   |
| Lubricant - skidder                 | 58       | kg   |
| Lubricant – sorting/loading logs    | 12.4     | kg   |
| Lubricant – sort/slash and chipping | 142      | kg   |
| Mass 4 wheeled skidder              | 21865    | kg   |
| Mass 6 wheeled skidder              | 24720    | kg   |
| Chipper mass                        | 45631    | kg   |
| Bulldozer mass                      | 19208    | kg   |
| Excavator mass                      | 30900    | kg   |
| Feller buncher mass                 | 36775    | kg   |
| Grader mass                         | 18634    | kg   |
| Loader mass                         | 26445    | kg   |
| Mass maintenance truck              | 4309     | kg   |
| Mass trailer                        | 5075     | kg   |
| Mass truck                          | 6033     | kg   |
| Chips transportation                | 675363   | Mgkm |
| Log transportation                  | 37945    | Mgkm |
| Staging coolant                     | 0.2      | kg   |
| Staging diesel                      | 871.4    | L    |
| Staging grease                      | 4.1      | USD  |
| Staging oil                         | 7.8      | kg   |

\* The logger used a 50% mixture of diesel and kerosene fuel. Therefore, the volume of diesel fuel reported here for each machine type represents half the total fuel that was consumed.

## SUPPLEMENTARY INFORMATION

**Table S3.** Sensitivity analysis results of the life cycle greenhouse gas emissions (kg CO<sub>2</sub>eq/Mg) of wood chips when varying the input parameters by a given percentage from their baseline values.

| Variable input parameters             | Life cycle GHG emissions (kg CO <sub>2</sub> /Mg chips) |       |       |       |       |       |       |
|---------------------------------------|---------------------------------------------------------|-------|-------|-------|-------|-------|-------|
|                                       | -25%                                                    | 10%   | 5%    | 0%    | 5%2   | 10%   | 25%   |
| Chip delivery diesel fuel             | 38.27                                                   | 39.17 | 39.47 | 39.77 | 40.07 | 40.38 | 41.28 |
| Diesel fuel – skidder                 | 38.93                                                   | 39.44 | 39.61 | 39.77 | 39.94 | 40.11 | 40.61 |
| Diesel fuel – chipper                 | 39.08                                                   | 39.50 | 39.64 | 39.77 | 39.91 | 40.05 | 40.46 |
| Diesel fuel – feller buncher          | 39.16                                                   | 39.53 | 39.65 | 39.77 | 39.90 | 40.02 | 40.38 |
| Diesel fuel – sort/slash and chipping | 39.29                                                   | 39.58 | 39.68 | 39.77 | 39.87 | 39.97 | 40.26 |
| Chips transportation                  | 39.60                                                   | 39.71 | 39.74 | 39.77 | 39.81 | 39.84 | 39.94 |
| Lifetime hours chipper                | 39.97                                                   | 39.84 | 39.80 | 39.77 | 39.75 | 39.72 | 39.66 |
| Chipper hours                         | 39.63                                                   | 39.72 | 39.74 | 39.77 | 39.80 | 39.83 | 39.92 |
| Lifetime hours skidder                | 39.93                                                   | 39.83 | 39.80 | 39.77 | 39.75 | 39.73 | 39.68 |
| Skidder hours                         | 39.66                                                   | 39.73 | 39.75 | 39.77 | 39.80 | 39.82 | 39.89 |
| Staging coolant                       | 39.66                                                   | 39.73 | 39.75 | 39.77 | 39.80 | 39.82 | 39.88 |
| Lifetime hours feller-buncher         | 39.91                                                   | 39.82 | 39.79 | 39.77 | 39.75 | 39.74 | 39.69 |
| Feller-buncher hours                  | 39.67                                                   | 39.73 | 39.75 | 39.77 | 39.79 | 39.81 | 39.87 |
| Lifetime truck                        | 39.90                                                   | 39.82 | 39.79 | 39.77 | 39.76 | 39.74 | 39.70 |
| Diesel fuel – excavator               | 39.68                                                   | 39.74 | 39.75 | 39.77 | 39.79 | 39.81 | 39.87 |
| Diesel fuel – fuel/maintenance        | 39.68                                                   | 39.74 | 39.75 | 39.77 | 39.79 | 39.81 | 39.87 |
| Lifetime trailer                      | 39.88                                                   | 39.81 | 39.79 | 39.77 | 39.76 | 39.75 | 39.71 |
| Mass trailler                         | 39.70                                                   | 39.74 | 39.76 | 39.77 | 39.79 | 39.80 | 39.85 |
| Lifetime hours loader                 | 39.83                                                   | 39.79 | 39.78 | 39.77 | 39.77 | 39.76 | 39.74 |
| Sort/slash chipping hours             | 39.73                                                   | 39.76 | 39.76 | 39.77 | 39.78 | 39.79 | 39.82 |
| Diesel fuel – bulldozer               | 39.74                                                   | 39.76 | 39.77 | 39.77 | 39.78 | 39.79 | 39.81 |
| Diesel fuel – grader                  | 39.74                                                   | 39.76 | 39.77 | 39.77 | 39.78 | 39.79 | 39.80 |
| Lifetime hours excavator              | 39.81                                                   | 39.78 | 39.78 | 39.77 | 39.77 | 39.76 | 39.75 |
| Loader mass                           | 39.81                                                   | 39.78 | 39.78 | 39.77 | 39.77 | 39.76 | 39.75 |
| Excavator hours                       | 39.75                                                   | 39.76 | 39.77 | 39.77 | 39.78 | 39.78 | 39.80 |
| Excavator mass                        | 39.75                                                   | 39.76 | 39.77 | 39.77 | 39.78 | 39.78 | 39.80 |
| Lifetime hours bulldozer              | 39.79                                                   | 39.78 | 39.78 | 39.77 | 39.77 | 39.77 | 39.76 |
| Mass 4 wheeled skidder                | 39.79                                                   | 39.78 | 39.78 | 39.77 | 39.77 | 39.77 | 39.76 |
| Bulldozer hours                       | 39.76                                                   | 39.77 | 39.77 | 39.77 | 39.78 | 39.78 | 39.79 |
| Bulldozer mass                        | 39.76                                                   | 39.77 | 39.77 | 39.77 | 39.78 | 39.78 | 39.79 |
| Chipper staging diesel fuel           | 39.76                                                   | 39.77 | 39.77 | 39.77 | 39.78 | 39.78 | 39.78 |
| Lubricant – chipper                   | 39.76                                                   | 39.77 | 39.77 | 39.77 | 39.78 | 39.78 | 39.78 |
| Lifetime hours maintenance truck      | 39.79                                                   | 39.78 | 39.78 | 39.77 | 39.77 | 39.77 | 39.77 |
| Mass truck                            | 39.79                                                   | 39.78 | 39.78 | 39.77 | 39.77 | 39.77 | 39.77 |
| Mass maintenance truck                | 39.76                                                   | 39.77 | 39.77 | 39.77 | 39.78 | 39.78 | 39.78 |
| Lifetime hours grader                 | 39.79                                                   | 39.78 | 39.78 | 39.77 | 39.77 | 39.77 | 39.77 |
| Mass 6 wheeled skidder                | 39.79                                                   | 39.78 | 39.78 | 39.77 | 39.77 | 39.77 | 39.77 |
| Skidder grease                        | 39.76                                                   | 39.77 | 39.77 | 39.77 | 39.78 | 39.78 | 39.78 |
| Grader hours                          | 39.77                                                   | 39.77 | 39.77 | 39.77 | 39.78 | 39.78 | 39.78 |
| Grader mass                           | 39.77                                                   | 39.77 | 39.77 | 39.77 | 39.78 | 39.78 | 39.78 |
| Lubricant - feller buncher            | 39.77                                                   | 39.77 | 39.77 | 39.77 | 39.78 | 39.78 | 39.78 |

## SUPPLEMENTARY INFORMATION

|                                     |       |       |       |       |       |       |       |
|-------------------------------------|-------|-------|-------|-------|-------|-------|-------|
| Lubricant – sort/slash and chipping | 39.77 | 39.77 | 39.77 | 39.77 | 39.78 | 39.78 | 39.78 |
| Chip delivery oil                   | 39.77 | 39.77 | 39.77 | 39.77 | 39.77 | 39.78 | 39.78 |
| Sort/slash and chipping grease      | 39.77 | 39.77 | 39.77 | 39.77 | 39.77 | 39.78 | 39.78 |
| Feller-buncher grease               | 39.77 | 39.77 | 39.77 | 39.77 | 39.77 | 39.78 | 39.78 |
| Chipper grease                      | 39.77 | 39.77 | 39.77 | 39.77 | 39.77 | 39.78 | 39.78 |
| Chip delivery grease                | 39.77 | 39.77 | 39.77 | 39.77 | 39.77 | 39.77 | 39.78 |
| Lubricant - skidder                 | 39.77 | 39.77 | 39.77 | 39.77 | 39.77 | 39.77 | 39.78 |
| Excavator grease                    | 39.77 | 39.77 | 39.77 | 39.77 | 39.77 | 39.77 | 39.77 |
| Bulldozer grease                    | 39.77 | 39.77 | 39.77 | 39.77 | 39.77 | 39.77 | 39.77 |
| Lubricant - excavator               | 39.77 | 39.77 | 39.77 | 39.77 | 39.77 | 39.77 | 39.77 |
| Grader grease                       | 39.77 | 39.77 | 39.77 | 39.77 | 39.77 | 39.77 | 39.77 |
| Staging oil                         | 39.77 | 39.77 | 39.77 | 39.77 | 39.77 | 39.77 | 39.77 |
| Chip delivery coolant               | 39.77 | 39.77 | 39.77 | 39.77 | 39.77 | 39.77 | 39.77 |
| Fuel/maintenance grease             | 39.77 | 39.77 | 39.77 | 39.77 | 39.77 | 39.77 | 39.77 |
| Staging diesel                      | 39.77 | 39.77 | 39.77 | 39.77 | 39.77 | 39.77 | 39.77 |
| Lubricant – grader                  | 39.77 | 39.77 | 39.77 | 39.77 | 39.77 | 39.77 | 39.77 |
| Lubricant – bulldozer               | 39.77 | 39.77 | 39.77 | 39.77 | 39.77 | 39.77 | 39.77 |
| Lubricant – fuel/maintenance        | 39.77 | 39.77 | 39.77 | 39.77 | 39.77 | 39.77 | 39.77 |
| Skidder coolant                     | 39.77 | 39.77 | 39.77 | 39.77 | 39.77 | 39.77 | 39.77 |
| Sort/slash and chipping coolant     | 39.77 | 39.77 | 39.77 | 39.77 | 39.77 | 39.77 | 39.77 |
| Feller-buncher coolant              | 39.77 | 39.77 | 39.77 | 39.77 | 39.77 | 39.77 | 39.77 |
| Chipper staging oil                 | 39.77 | 39.77 | 39.77 | 39.77 | 39.77 | 39.77 | 39.77 |
| Chipper coolant                     | 39.77 | 39.77 | 39.77 | 39.77 | 39.77 | 39.77 | 39.77 |
| Grader coolant                      | 39.77 | 39.77 | 39.77 | 39.77 | 39.77 | 39.77 | 39.77 |
| Bulldozer coolant                   | 39.77 | 39.77 | 39.77 | 39.77 | 39.77 | 39.77 | 39.77 |
| Chipper staging grease              | 39.77 | 39.77 | 39.77 | 39.77 | 39.77 | 39.77 | 39.77 |
| Excavator coolant                   | 39.77 | 39.77 | 39.77 | 39.77 | 39.77 | 39.77 | 39.77 |
| Log transportation                  | 39.77 | 39.77 | 39.77 | 39.77 | 39.77 | 39.77 | 39.77 |
| Fuel/maintenance coolant            | 39.77 | 39.77 | 39.77 | 39.77 | 39.77 | 39.77 | 39.77 |
| Chipper staging coolant             | 39.77 | 39.77 | 39.77 | 39.77 | 39.77 | 39.77 | 39.77 |
| Slashing/loading logs coolant       | 39.77 | 39.77 | 39.77 | 39.77 | 39.77 | 39.77 | 39.77 |
| Diesel fuel – sorting/loading logs  | 39.77 | 39.77 | 39.77 | 39.77 | 39.77 | 39.77 | 39.77 |
| Slashing/loading logs grease        | 39.77 | 39.77 | 39.77 | 39.77 | 39.77 | 39.77 | 39.77 |
| Fuel/maintenance hours              | 39.77 | 39.77 | 39.77 | 39.77 | 39.77 | 39.77 | 39.77 |
| Slashing/loading logs hours         | 39.77 | 39.77 | 39.77 | 39.77 | 39.77 | 39.77 | 39.77 |
| Coolant – log delivery              | 39.77 | 39.77 | 39.77 | 39.77 | 39.77 | 39.77 | 39.77 |
| Diesel – log delivery               | 39.77 | 39.77 | 39.77 | 39.77 | 39.77 | 39.77 | 39.77 |
| Grease – log delivery               | 39.77 | 39.77 | 39.77 | 39.77 | 39.77 | 39.77 | 39.77 |
| Engine oil – log delivery           | 39.77 | 39.77 | 39.77 | 39.77 | 39.77 | 39.77 | 39.77 |
| Lubricant – sorting/loading logs    | 39.77 | 39.77 | 39.77 | 39.77 | 39.77 | 39.77 | 39.77 |
| Chipper mass                        | 39.77 | 39.77 | 39.77 | 39.77 | 39.77 | 39.77 | 39.77 |
| Feller buncher mass                 | 39.77 | 39.77 | 39.77 | 39.77 | 39.77 | 39.77 | 39.77 |
| Staging grease                      | 39.77 | 39.77 | 39.77 | 39.77 | 39.77 | 39.77 | 39.77 |
| Mass fraction - chips               | 39.85 | 39.85 | 39.85 | 39.77 | 39.67 | 39.67 | 39.67 |



## SUPPLEMENTARY INFORMATION

**Table S4.** Sensitivity analysis results of the life cycle greenhouse gas emissions (kg CO<sub>2</sub>eq/Mg)

of logs when varying the input parameters by a given percentage from their baseline values.

[illegible]

## SUPPLEMENTARY INFORMATION

|                                     |       |       |       |       |       |       |       |
|-------------------------------------|-------|-------|-------|-------|-------|-------|-------|
| Lubricant - excavator               | 25.15 | 25.15 | 25.15 | 25.15 | 25.15 | 25.15 | 25.15 |
| Grader grease                       | 25.15 | 25.15 | 25.15 | 25.15 | 25.15 | 25.15 | 25.15 |
| Staging oil                         | 25.15 | 25.15 | 25.15 | 25.15 | 25.15 | 25.15 | 25.15 |
| Fuel/maintenance grease             | 25.15 | 25.15 | 25.15 | 25.15 | 25.15 | 25.15 | 25.15 |
| Staging diesel                      | 25.15 | 25.15 | 25.15 | 25.15 | 25.15 | 25.15 | 25.15 |
| Coolant – log delivery              | 25.15 | 25.15 | 25.15 | 25.15 | 25.15 | 25.15 | 25.15 |
| Lubricant – grader                  | 25.15 | 25.15 | 25.15 | 25.15 | 25.15 | 25.15 | 25.15 |
| Lubricant – bulldozer               | 25.15 | 25.15 | 25.15 | 25.15 | 25.15 | 25.15 | 25.15 |
| Lubricant – fuel/maintenance        | 25.15 | 25.15 | 25.15 | 25.15 | 25.15 | 25.15 | 25.15 |
| Skidder coolant                     | 25.15 | 25.15 | 25.15 | 25.15 | 25.15 | 25.15 | 25.15 |
| Feller-buncher coolant              | 25.15 | 25.15 | 25.15 | 25.15 | 25.15 | 25.15 | 25.15 |
| Slashing/loading logs coolant       | 25.15 | 25.15 | 25.15 | 25.15 | 25.15 | 25.15 | 25.15 |
| Grader coolant                      | 25.15 | 25.15 | 25.15 | 25.15 | 25.15 | 25.15 | 25.15 |
| Bulldozer coolant                   | 25.15 | 25.15 | 25.15 | 25.15 | 25.15 | 25.15 | 25.15 |
| Excavator coolant                   | 25.15 | 25.15 | 25.15 | 25.15 | 25.15 | 25.15 | 25.15 |
| Log transportation                  | 25.15 | 25.15 | 25.15 | 25.15 | 25.15 | 25.15 | 25.15 |
| Fuel/maintenance coolant            | 25.15 | 25.15 | 25.15 | 25.15 | 25.15 | 25.15 | 25.15 |
| Chipper staging coolant             | 25.15 | 25.15 | 25.15 | 25.15 | 25.15 | 25.15 | 25.15 |
| Chipper staging diesel fuel         | 25.15 | 25.15 | 25.15 | 25.15 | 25.15 | 25.15 | 25.15 |
| Chipper staging grease              | 25.15 | 25.15 | 25.15 | 25.15 | 25.15 | 25.15 | 25.15 |
| Chipper staging oil                 | 25.15 | 25.15 | 25.15 | 25.15 | 25.15 | 25.15 | 25.15 |
| Chip delivery coolant               | 25.15 | 25.15 | 25.15 | 25.15 | 25.15 | 25.15 | 25.15 |
| Chip delivery diesel fuel           | 25.15 | 25.15 | 25.15 | 25.15 | 25.15 | 25.15 | 25.15 |
| Chip delivery grease                | 25.15 | 25.15 | 25.15 | 25.15 | 25.15 | 25.15 | 25.15 |
| Chip delivery oil                   | 25.15 | 25.15 | 25.15 | 25.15 | 25.15 | 25.15 | 25.15 |
| Chipper coolant                     | 25.15 | 25.15 | 25.15 | 25.15 | 25.15 | 25.15 | 25.15 |
| Sort/slash and chipping coolant     | 25.15 | 25.15 | 25.15 | 25.15 | 25.15 | 25.15 | 25.15 |
| Diesel fuel–sort/slash and chipping | 25.15 | 25.15 | 25.15 | 25.15 | 25.15 | 25.15 | 25.15 |
| Chipper grease                      | 25.15 | 25.15 | 25.15 | 25.15 | 25.15 | 25.15 | 25.15 |
| Sort/slash and chipping grease      | 25.15 | 25.15 | 25.15 | 25.15 | 25.15 | 25.15 | 25.15 |
| Chipper hours                       | 25.15 | 25.15 | 25.15 | 25.15 | 25.15 | 25.15 | 25.15 |
| Fuel/maintenance hours              | 25.15 | 25.15 | 25.15 | 25.15 | 25.15 | 25.15 | 25.15 |
| Sort/slash chipping hours           | 25.15 | 25.15 | 25.15 | 25.15 | 25.15 | 25.15 | 25.15 |
| Lifetime hours chipper              | 25.15 | 25.15 | 25.15 | 25.15 | 25.15 | 25.15 | 25.15 |
| Lubricant – chipper                 | 25.15 | 25.15 | 25.15 | 25.15 | 25.15 | 25.15 | 25.15 |
| Lubricant – sort/slash and chipping | 25.15 | 25.15 | 25.15 | 25.15 | 25.15 | 25.15 | 25.15 |
| Chipper mass                        | 25.15 | 25.15 | 25.15 | 25.15 | 25.15 | 25.15 | 25.15 |
| Feller buncher mass                 | 25.15 | 25.15 | 25.15 | 25.15 | 25.15 | 25.15 | 25.15 |
| Chips transportation                | 25.15 | 25.15 | 25.15 | 25.15 | 25.15 | 25.15 | 25.15 |
| Mass fraction - logs                | 24.42 | 24.42 | 24.42 | 25.15 | 26.05 | 26.05 | 26.05 |
